# Supplementary material for: The sperm quality change in 6 months recovery from COVID-19 : a retrospective observational study
Source: Research Square preprint supplement (doi:10.21203/rs.3.rs-6176749/v1), 2025-03-17
Supplement: Supplementary file 1 [file f47e970451cb43d769cabe4c.docx]

**Supplementary Data**

| **Table 1. Sensitivity analysis of Primary Outcomes at 0, 1st, 2nd, 3rd, and 6th Month** | | | |
| --- | --- | --- | --- |
| Time | Sensitivity analysis | Concentration (Con) | Progressive motility (PR) |
| 0 month | Bootstrapped | 78·91(66·98-93·43) | 51·58(47·35-55·79) |
| Multiple Imputation | 78·91(65·24-92·58) | 51·58(47·06-56·10) |
| 1st month | Bootstrapped | 39·22(32·25-46·75) | 36·41(32·30-40·73) |
| Multiple Imputation | 39·22(31·85-46·59) | 36·41(32·19-40·63) |
| 2nd month | Bootstrapped | 51·05(41·22-62·85) | 43·78(39·10-48·55) |
| Multiple Imputation | 51·05(40·27-61·82) | 43·78(38·94-48·62) |
| 3rd month | Bootstrapped | 63·34(52·39-75·91) | 45·62(40·97-50·59) |
| Multiple Imputation | 63·34(50·77-75·91) | 45·62(40·69-50·55) |
| 6th month | Bootstrapped | 58·48(48·98-68·13) | 45·67(41·43-49·77) |
| Multiple Imputation | 58·48(48·53-68·43) | 45·67(41·29-50·05) |

| **Table 2. The reliability and validity analysis of questionnaire** | | | |
| --- | --- | --- | --- |
| Variable | Cronbach’s Alpha | KMO value | Bartlett value |
| Life Quality | 0·908 | -- | -- |
| Self-rating Depression Scale  (SDS) | 0·840 | 0·682 | <0·001 |
| Self-Rating Anxiety Scale  (SAS) | 0·731 | 0·569 | <0·001 |
| International index of Erectile function (IIEF-5) | 0·833 | 0·794 | <0·001 |
| International Prostate Symptom Score (I-PSS) | 0·823 | 0·789 | <0·001 |
| premature ejaculation diagnostic  tool (PEDT) | 0·905 | 0·828 | <0·001 |


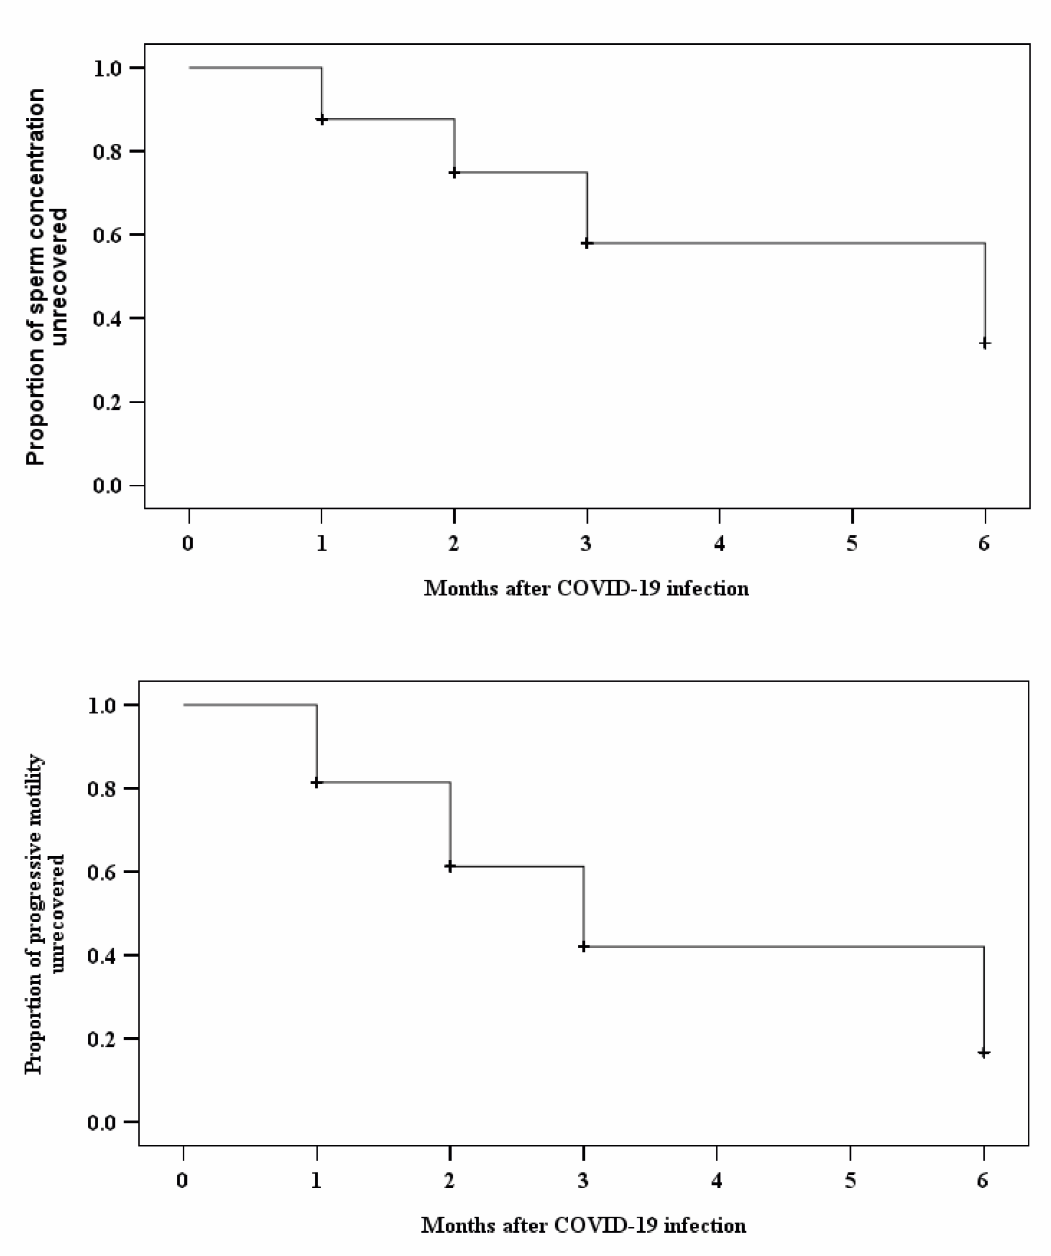


**Figure 1. Survival curves reanalysis for non-recovery of sperm concentration and progressive motility rate (PR) to pre-Covid-19 infection levels using the comprehensive dataset from all 139 participants originally enrolled in the study.**
